# Supplementary material for: Reversible colour changes of mixed films composed of 4,4′-bis[bis(4-methylphenyl)amino]azobenzene and organic acids in response to exhaled breath
Source: Royal Society of Chemistry journal article supplement (doi:10.1039/c7qm00385d), 2017-11-03
Supplement: c7qm00385d1.pdf [file c7qm00385d1.pdf]

## Supplementary Information

### Reversible colour changes of mixed films composed of 4,4'-bis[bis(4-methylphenyl)amino]azobenzene and organic acids in response to exhaled breath

Yuya Kitamura, Ryoji Ichikawa and Hideyuki Nakano\*

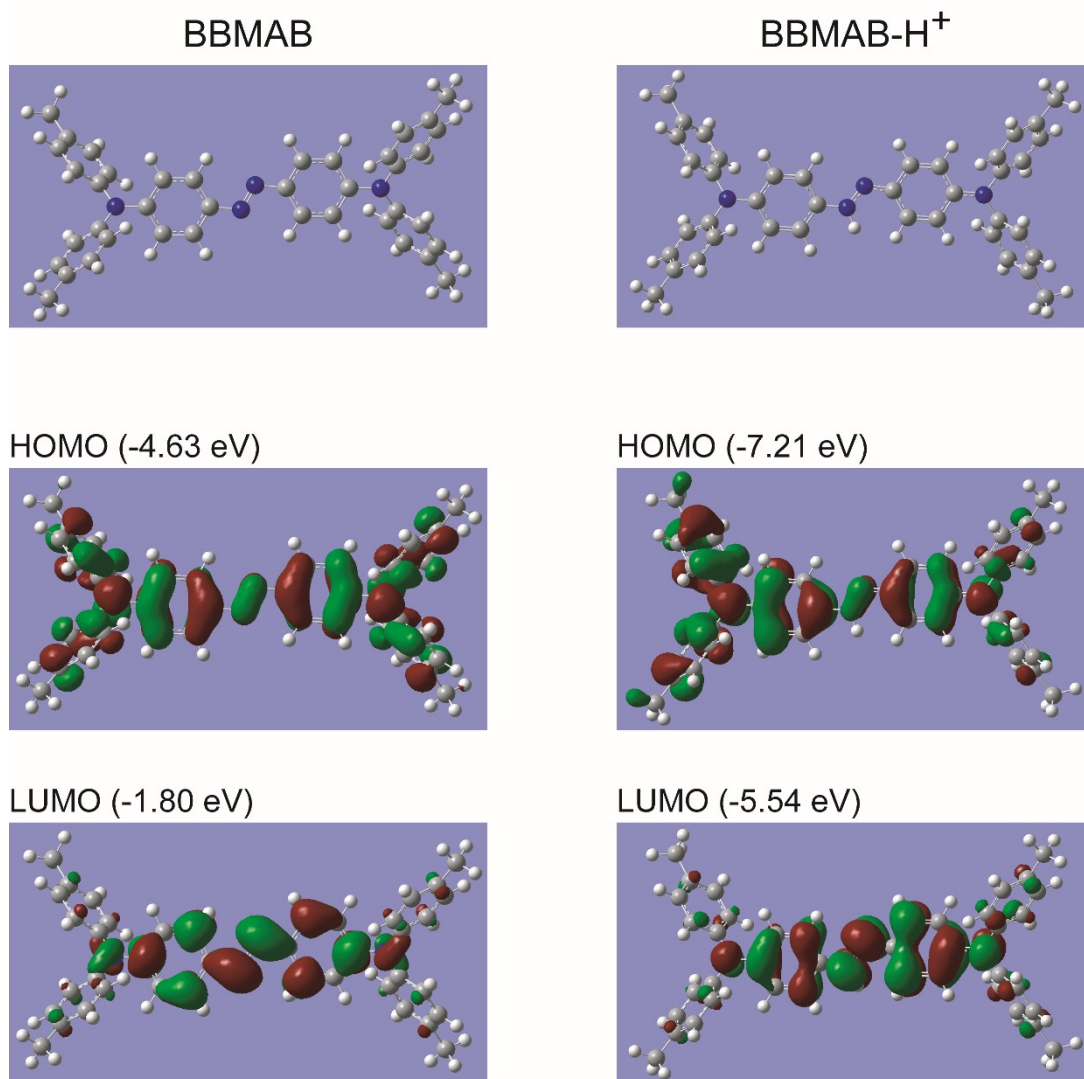

**Fig. S1** Optimized molecular structures together with their HOMO and LUMO surfaces of BBMAB and BBMAB-H<sup>+</sup> obtained by DFT calculation (B3LYP/6-31G(d,p))
